# Supplementary material for: Hepatic Expression Patterns of Inflammatory and Immune Response Genes Associated with Obesity and NASH in Morbidly Obese Patients
Source: PubMed Central journal article supplement (PMC2962651; doi:10.1371/journal.pone.0013577), 2010-10-22
Supplement: pone.0013577.s001.pdf [file pone.0013577.s001.pdf]

**Table S1. Genes included in the study**

| Gene symbol                                       | Gene alias   | Gene name                                                                                                                                   | NCBI number                                                             | Assay ID      | Detected |
|---------------------------------------------------|--------------|---------------------------------------------------------------------------------------------------------------------------------------------|-------------------------------------------------------------------------|---------------|----------|
| CD                                                |              |                                                                                                                                             |                                                                         |               |          |
| CD3E                                              |              | CD3E antigen, epsilon polypeptide (T1T3 complex)                                                                                            | NM_000733.2                                                             | HS00167894_m1 | Yes      |
| CD4                                               |              | CD4 antigen (p55)                                                                                                                           | NM_000616.2                                                             | HS00181217_m1 | Yes      |
| CD8A                                              |              | CD8 antigen, alpha polypeptide (p32)                                                                                                        | NM_171827.1,NM_001768.4                                                 | HS00233520_m1 | Yes      |
| CD11b                                             | ITGAM, CR3A  | CD11b antigen (p170); integrin, alpha M; complement component receptor 3, alpha (macrophage antigen alpha polypeptide)                      | NM_000632.2                                                             | HS00355885_m1 | Yes      |
| CD18                                              | ITGB2, LFA-1 | CD18 antigen (p95); integrin, beta 2; lymphocyte function-associated antigen 1 (macrophage antigen 1 (mac-1) beta subunit)                  | NM_000211.1                                                             | HS00164957_m1 | Yes      |
| CD19                                              |              | CD19 antigen                                                                                                                                | NM_001770.3                                                             | HS00174333_m1 | Yes      |
| CD28                                              |              | CD28 antigen (Tp44)                                                                                                                         | NM_006139.1                                                             | HS00174796_m1 | Yes      |
| CD34                                              |              | CD34 antigen                                                                                                                                | NM_001025109.1,NM_001773.1                                              | HS00156373_m1 | Yes      |
| CD36                                              |              | CD36 antigen (collagen type I receptor, thrombospondin receptor)                                                                            | NM_001001547.1,NM_001001548.1,NM_000072.2                               | HS00169627_m1 | Yes      |
| CD38                                              |              | CD38 antigen (p45)                                                                                                                          | NM_001775.2                                                             | HS00233552_m1 | Yes      |
| CD40                                              |              | CD40 antigen (TNF receptor superfamily member 5)                                                                                            | NM_152854.1,NM_001250.3                                                 | HS00388848_m1 | Yes      |
| CD44                                              |              | CD44 antigen (Rh-related antigen, integrin-associated signal transducer)                                                                    | NM_001001389.1,NM_001001390.1,NM_001001391.1,NM_001001392.1,NM_000610.3 | HS00153304_m1 | Yes      |
| CD47                                              |              | CD47 antigen (lymphocyte function-associated antigen 3)                                                                                     | NM_001778.2                                                             | HS00381156_m1 | Yes      |
| CD48                                              | LFA-3        | CD48 antigen; lymphocyte function-associated antigen 3                                                                                      | NM_000201.1                                                             | HS00164932_m1 | Yes      |
| CD54                                              | ICAM1        | CD54 antigen; intercellular adhesion molecule 1                                                                                             | NM_000450.1                                                             | HS00174057_m1 | Yes      |
| CD62E                                             | SELE         | CD62E antigen; selectin E (endothelial adhesion molecule 1)                                                                                 | NM_003005.2                                                             | HS00174583_m1 | Yes      |
| CD62P                                             | SELP         | CD62P antigen; selectin P (granule membrane protein 140kDa)                                                                                 | NM_001251.1                                                             | HS00154355_m1 | Yes      |
| CD68                                              | macrosialin  | CD68 antigen                                                                                                                                | NM_001781.1                                                             | HS00156399_m1 | Yes      |
| CD69                                              | EA-1         | CD69 antigen (p60); early T-cell activation antigen                                                                                         | NM_005191.2                                                             | HS00175478_m1 | Yes      |
| CD80                                              | B7-1         | CD80 antigen (CD28 antigen ligand 1); B7-1 antigen                                                                                          | NM_004356.3                                                             | HS00174717_m1 | Yes      |
| CD81                                              | TAPA-1       | CD81 antigen; target of antiproliferative antibody 1                                                                                        | NM_00199349_m1                                                          | HS00199349_m1 | Yes      |
| CD86                                              | B7-2         | CD86 antigen (CD28 antigen ligand 2); B7-2 antigen                                                                                          | NM_175862.2,NM_006889.2                                                 | HS00175480_m1 | Yes      |
| CD152                                             | CTLA-4       | CD152 antigen; cytotoxic T-lymphocyte-associated protein 4                                                                                  | NM_005214.2                                                             | HS00163934_m1 | Yes      |
| CD154                                             |              | CD40 ligand (TNF superfamily, member 5)                                                                                                     | NM_000074.2                                                             | HS00163934_m1 | Yes      |
| CD180                                             |              | CD180 antigen                                                                                                                               | NM_005582.1                                                             | HS00194403_m1 | Yes      |
| CD209                                             |              | CD209 antigen                                                                                                                               | NM_021155.2                                                             | HS00253550_m1 | Yes      |
| <b>Chemokines and chemokine receptors</b>         |              |                                                                                                                                             |                                                                         |               |          |
| <b>CC chemokines and CC chemokine receptors</b>   |              |                                                                                                                                             |                                                                         |               |          |
| CCL2                                              | MCP-1        | chemokine (C-C motif) ligand 2; monocyte chemoattractant protein 1                                                                          | NM_002982.3                                                             | HS00234140_m1 | Yes      |
| CCL3                                              | MIP-1α       | chemokine (C-C motif) ligand 3; macrophage inflammatory protein 1, alpha                                                                    | NM_002983.1                                                             | HS00234142_m1 | Yes      |
| CCL4                                              | MIP-1β       | chemokine (C-C motif) ligand 4; macrophage inflammatory protein 1, beta                                                                     | NM_002984.1                                                             | HS00605740_g1 | Yes      |
| CCL5                                              | RANTES       | chemokine (C-C motif) ligand 5; regulated on activation, normal T cell expressed and secreted                                               | NM_002985.2                                                             | HS00174575_m1 | Yes      |
| CCL7                                              | MCP-3        | chemokine (C-C motif) ligand 7; monocyte chemoattractant protein 3                                                                          | NM_006273.2                                                             | HS00171147_m1 | No       |
| CCL19                                             | MIP-3β       | chemokine (C-C motif) ligand 19; macrophage inflammatory protein 3, beta                                                                    | NM_006274.2                                                             | HS00171149_m1 | Yes      |
| CCL21                                             | 6CKine       | chemokine (C-C motif) ligand 21                                                                                                             | NM_002989.2                                                             | HS00171076_m1 | Yes      |
| CCR2                                              |              | chemokine (C-C motif) receptor 2                                                                                                            | NM_000647.3                                                             | HS00174150_m1 | No       |
| CCR4                                              |              | chemokine (C-C motif) receptor 4                                                                                                            | NM_005508.4                                                             | HS9999919_m1  | Yes      |
| CCR5                                              |              | chemokine (C-C motif) receptor 5                                                                                                            | NM_000579.1                                                             | HS00152917_m1 | Yes      |
| CCR7                                              |              | chemokine (C-C motif) receptor 7                                                                                                            | NM_001838.2                                                             | HS00171054_m1 | Yes      |
| <b>CXC chemokines and CXC chemokine receptors</b> |              |                                                                                                                                             |                                                                         |               |          |
| CXCL1                                             | GROα         | chemokine (C-X-C motif) ligand 1; growth-regulated oncogene, alpha                                                                          | NM_001511.1                                                             | HS00236937_m1 | Yes      |
| CXCL2                                             | GROβ         | chemokine (C-X-C motif) ligand 2; growth-regulated oncogene, beta                                                                           | NM_002089.1                                                             | HS00236966_m1 | Yes      |
| CXCL3                                             | GROγ         | chemokine (C-X-C motif) ligand 3; growth-regulated oncogene, gamma                                                                          | NM_002090.2                                                             | HS00171061_m1 | Yes      |
| CXCL8                                             | IL8          | chemokine (C-X-C motif) ligand 8; interleukin 8                                                                                             | NM_000584.2                                                             | HS00174103_m1 | Yes      |
| CXCL9                                             | Mig          | chemokine (C-X-C motif) ligand 9; monokine induced by interferon-gamma                                                                      | NM_002416.1                                                             | HS00171065_m1 | Yes      |
| CXCL10                                            | IP-10        | chemokine (C-X-C motif) ligand 10; interferon-inducible protein 10                                                                          | NM_001565.1                                                             | HS00171042_m1 | Yes      |
| CXCL11                                            | I-TAC        | chemokine (C-X-C motif) ligand 11; interferon-inducible T cell alpha chemoattractant                                                        | NM_005409.3                                                             | HS00171138_m1 | Yes      |
| CXCL16                                            |              | chemokine (C-X-C motif) ligand 16                                                                                                           | NM_022059.1                                                             | HS00222859_m1 | Yes      |
| CXCR1                                             | IL8RA        | chemokine (C-X-C motif) receptor 1; interleukin 8 receptor, alpha                                                                           | NM_000634.2                                                             | HS00174146_m1 | Yes      |
| CXCR2                                             | IL8RB        | chemokine (C-X-C motif) receptor 2; interleukin 8 receptor, beta                                                                            | NM_001557.2                                                             | HS00174304_m1 | Yes      |
| CXCR3                                             |              | chemokine (C-X-C motif) receptor 3                                                                                                          | NM_001504.1                                                             | HS00171041_m1 | Yes      |
| CXCR4                                             |              | chemokine (C-X-C motif) receptor 4                                                                                                          | NM_003467.2                                                             | HS00237052_m1 | Yes      |
| <b>Semaphorins, plexins and neuropilins</b>       |              |                                                                                                                                             |                                                                         |               |          |
| SEMA3A                                            |              | sema domain, immunoglobulin domain (lg), short basic domain, secreted, (semaphorin) 3A                                                      | NM_006080.1                                                             | HS00173810_m1 | Yes      |
| SEMA3B                                            |              | sema domain, immunoglobulin domain (lg), short basic domain, secreted, (semaphorin) 3B                                                      | NM_001005914.1,NM_004636.2                                              | HS00190328_m1 | Yes      |
| SEMA3C                                            |              | sema domain, immunoglobulin domain (lg), short basic domain, secreted, (semaphorin) 3C                                                      | NM_006379.2                                                             | HS00170762_m1 | Yes      |
| SEMA3D                                            |              | sema domain, immunoglobulin domain (lg), short basic domain, secreted, (semaphorin) 3D                                                      | NM_152754.2                                                             | HS00380877_m1 | Yes      |
| SEMA3E                                            |              | sema domain, immunoglobulin domain (lg), short basic domain, secreted, (semaphorin) 3E                                                      | NM_012431.1                                                             | HS00180842_m1 | Yes      |
| SEMA3F                                            |              | sema domain, immunoglobulin domain (lg), short basic domain, secreted, (semaphorin) 3F                                                      | NM_004186.2                                                             | HS00188273_m1 | Yes      |
| SEMA3G                                            |              | sema domain, immunoglobulin domain (lg), short basic domain, secreted, (semaphorin) 3G                                                      | NM_020163.1                                                             | HS00220101_m1 | Yes      |
| SEMA4A                                            |              | sema domain, immunoglobulin domain (lg), transmembrane domain (TM) and short cytoplasmic domain, (semaphorin) 4A                            | NM_022367.2                                                             | HS00223617_m1 | Yes      |
| SEMA4B                                            |              | sema domain, immunoglobulin domain (lg), transmembrane domain (TM) and short cytoplasmic domain, (semaphorin) 4B                            | NM_198925.1,NM_020210.2                                                 | HS00384240_m1 | Yes      |
| SEMA4C                                            |              | sema domain, immunoglobulin domain (lg), transmembrane domain (TM) and short cytoplasmic domain, (semaphorin) 4C                            | NM_017789.3                                                             | HS00215035_m1 | Yes      |
| SEMA4D                                            |              | sema domain, immunoglobulin domain (lg), transmembrane domain (TM) and short cytoplasmic domain, (semaphorin) 4D                            | NM_006378.2                                                             | HS00174819_m1 | Yes      |
| SEMA4F                                            |              | sema domain, immunoglobulin domain (lg), transmembrane domain (TM) and short cytoplasmic domain, (semaphorin) 4F                            | NM_004263.2                                                             | HS00188642_m1 | Yes      |
| SEMA4G                                            |              | sema domain, immunoglobulin domain (lg), transmembrane domain (TM) and short cytoplasmic domain, (semaphorin) 4G                            | NM_017893.2                                                             | HS00706622_s1 | Yes      |
| SEMA5A                                            |              | sema domain, seven thrombospondin repeats (type 1 and type 1-like), transmembrane domain (TM) and short cytoplasmic domain, (semaphorin) 5A | NM_003966.1                                                             | HS00187651_m1 | Yes      |
| SEMA5B                                            |              | sema domain, seven thrombospondin repeats (type 1 and type 1-like), transmembrane domain (TM) and short cytoplasmic domain, (semaphorin) 5B | NM_018987.1,NM_001031702.1                                              | HS00400720_m1 | Yes      |
| SEMA6A                                            |              | sema domain, transmembrane domain (TM), and cytoplasmic domain, (semaphorin) 6A                                                             | NM_020796.2                                                             | HS00221174_m1 | Yes      |
| SEMA6B                                            |              | sema domain, transmembrane domain (TM), and cytoplasmic domain, (semaphorin) 6B                                                             | NM_032108.2,NM_133327.1                                                 | HS00259527_m1 | Yes      |
| SEMA6C                                            |              | sema domain, transmembrane domain (TM), and cytoplasmic domain, (semaphorin) 6C                                                             | NM_030913.3                                                             | HS00229454_m1 | Yes      |

|                              |                                                                                                            |                                                                         |                |     |
|------------------------------|------------------------------------------------------------------------------------------------------------|-------------------------------------------------------------------------|----------------|-----|
| SEMA6D                       | sema domain, transmembrane domain (TM), and cytoplasmic domain, (semaphorin) 6D                            | NM_024966.2,NM_020858.1,NM_153616.1,NM_153617.1,NM_153618.1,NM_153619.1 | HS00227965_m1  | Yes |
| SEMA7A                       | sema domain, immunoglobulin domain (Ig), and GPI membrane anchor, (semaphorin) 7A                          | NM_003612.1                                                             | HS00175305_m1  | Yes |
| PLXNA1                       | plexin A1                                                                                                  | NM_032242.2                                                             | HS00413698_m1  | Yes |
| PLXNA2                       | plexin A2                                                                                                  | NM_025179.2                                                             | HS00390230_m1  | Yes |
| PLXNA3                       | plexin A3                                                                                                  | NM_017514.2                                                             | HS00250178_m1  | Yes |
| PLXNA4B                      | plexin A4, B                                                                                               | NM_181775.2                                                             | HS00297356_m1  | Yes |
| PLXNB1                       | plexin B1                                                                                                  | NM_002673.3                                                             | HS00182227_m1  | Yes |
| PLXNB3                       | plexin B3                                                                                                  | NM_005393.1                                                             | HS00193613_m1  | Yes |
| PLXNC1                       | plexin C1                                                                                                  | NM_005761.1                                                             | HS00194968_m1  | Yes |
| PLXND1                       | plexin D1                                                                                                  | NM_015103.1                                                             | HS00391129_m1  | Yes |
| NRP1                         | neuropilin 1                                                                                               | NM_003873.5                                                             | HS00818574_m1  | Yes |
| NRP2                         | neuropilin 2                                                                                               | NM_018534.3,NM_201264.1,NM_201266.1,NM_201267.1,NM_201279.1,NM_003872.2 | HS00187290_m1  | Yes |
| <b>Interleukin pathway</b>   |                                                                                                            |                                                                         |                |     |
| IL1A                         | interleukin 1, alpha                                                                                       | NM_000575.3                                                             | HS00174092_m1  | No  |
| IL1B                         | interleukin 1, beta                                                                                        | NM_000576.2                                                             | HS00174097_m1  | Yes |
| IL1F9                        | interleukin 1 family, member 9                                                                             | NM_019618.2                                                             | HS00219742_m1  | No  |
| IL1R1                        | interleukin 1 receptor, type I                                                                             | NM_000877.2                                                             | HS00168392_m1  | Yes |
| IL1R2                        | interleukin 1 receptor, type II                                                                            | NM_173343.1,NM_004633.3                                                 | HS00174759_m1  | Yes |
| IL1RAP                       | interleukin 1 receptor accessory protein                                                                   | NM_002182.2                                                             | HS00158057_m1  | Yes |
| IL1RN                        | interleukin 1 receptor antagonist                                                                          | NM_173841.1,NM_173842.1,NM_173843.1,NM_000577.3                         | HS00277299_m1  | Yes |
| IL2                          | interleukin 2                                                                                              | NM_000586.2                                                             | HS00174114_m1  | No  |
| IL2RA                        | interleukin 2 receptor, alpha                                                                              | NM_000417.1                                                             | HS00166229_m1  | Yes |
| IL2RG                        | interleukin 2 receptor, gamma (severe combined immunodeficiency)                                           | NM_000206.1                                                             | HS00173950_m1  | Yes |
| IL3                          | interleukin 3 (colony-stimulating factor, multiple)                                                        | NM_000588.3                                                             | HS00174117_m1  | No  |
| IL3RA                        | interleukin 3 receptor, alpha (low affinity)                                                               | NM_002183.2                                                             | HS00174356_m1  | Yes |
| IL4                          | interleukin 4                                                                                              | NM_172348.1,NM_000589.2                                                 | HS00174122_m1  | No  |
| IL4R                         | interleukin 4 receptor                                                                                     | NM_000879.2                                                             | HS00166237_m1  | Yes |
| IL5                          | interleukin 5 (colony-stimulating factor, eosinophil)                                                      | NM_000600.1                                                             | HS00174200_m1  | No  |
| IL6                          | interleukin 6 (interferon, beta 2)                                                                         | NM_181359.1,NM_000565.2                                                 | HS00174131_m1  | Yes |
| IL6R                         | interleukin 6 receptor                                                                                     | NM_175767.1,NM_002184.2                                                 | HS00794121_m1  | Yes |
| IL6ST                        | interleukin 6 signal transducer (gp130 oncostatin M receptor)                                              | NM_000880.2                                                             | HS00174360_m1  | Yes |
| IL7                          | interleukin 7                                                                                              | NM_002185.2                                                             | HS00174202_m1  | Yes |
| IL7R                         | interleukin 7 receptor                                                                                     | NM_002185.2                                                             | HS00233682_m1  | Yes |
| IL9                          | interleukin 9                                                                                              | NM_000590.1                                                             | HS00174125_m1  | No  |
| IL9R                         | interleukin 9 receptor                                                                                     | NM_002186.2                                                             | HS00174371_m1  | No  |
| IL10                         | interleukin 10                                                                                             | NM_000572.2                                                             | HS00174086_m1  | Yes |
| IL10RA                       | interleukin 10 receptor, alpha                                                                             | NM_001558.2                                                             | HS00387004_m1  | Yes |
| IL10RB                       | interleukin 10 receptor, beta                                                                              | NM_000628.3                                                             | HS00175123_m1  | Yes |
| IL11                         | interleukin 11                                                                                             | NM_000641.2                                                             | HS00174148_m1  | No  |
| IL12A                        | interleukin 12A (p35) (natural killer cell stimulatory factor 1, cytotoxic lymphocyte maturation factor 1) | NM_000882.2                                                             | HS00168405_m1  | Yes |
| IL12B                        | interleukin 12B (p40) (natural killer cell stimulatory factor 2, cytotoxic lymphocyte maturation factor 2) | NM_002187.2                                                             | HS00233688_m1  | No  |
| IL12RB1                      | interleukin 12 receptor, beta 1                                                                            | NM_153701.1,NM_005535.1                                                 | HS000538167_m1 | Yes |
| IL12RB2                      | interleukin 12 receptor, beta 2                                                                            | NM_001559.2                                                             | HS00155486_m1  | Yes |
| IL13                         | interleukin 13                                                                                             | NM_002188.2                                                             | HS00174379_m1  | No  |
| IL13RA2                      | interleukin 13 receptor, alpha 2                                                                           | NM_000640.2                                                             | HS00152924_m1  | Yes |
| IL15                         | interleukin 15                                                                                             | NM_000585.2                                                             | HS00174106_m1  | Yes |
| IL15RA                       | interleukin 15 receptor, alpha                                                                             | NM_002189.2                                                             | HS00233692_m1  | Yes |
| IL16                         | interleukin 16, lymphocyte chemoattractant factor                                                          | NM_172217.1,NM_004513.3                                                 | HS00189606_m1  | Yes |
| IL17                         | interleukin 17, cytotoxic T-lymphocyte-associated serine esterase 8                                        | NM_002190.2                                                             | HS00174383_m1  | No  |
| IL17B                        | interleukin 17B                                                                                            | NM_014443.2                                                             | HS002056368_m1 | No  |
| IL17D                        | interleukin 17D                                                                                            | NM_138284.1                                                             | HS00370528_m1  | No  |
| IL17R                        | interleukin 17 receptor                                                                                    | NM_014339.3                                                             | HS002344888_m1 | Yes |
| IL18                         | interleukin 18, interferon-gamma-inducing factor                                                           | NM_001562.2                                                             | HS00155517_m1  | Yes |
| IL18BP                       | interleukin 18 binding protein                                                                             | NM_173042.1,NM_173044.1,NM_005699.2                                     | HS00271720_m1  | Yes |
| IL18R1                       | interleukin 18 receptor 1                                                                                  | NM_003855.2                                                             | HS00175381_m1  | Yes |
| IL18RAP                      | interleukin 18 receptor accessory protein                                                                  | NM_003853.2                                                             | HS00187256_m1  | Yes |
| IL20                         | interleukin 20                                                                                             | NM_018724.3                                                             | HS00218888_m1  | No  |
| IL22                         | interleukin 22                                                                                             | NM_020525.4                                                             | HS00220924_m1  | No  |
| IL22RA1                      | interleukin 22 receptor, alpha 1                                                                           | NM_021258.2                                                             | HS00222035_m1  | Yes |
| IL27RA                       | interleukin 27 receptor, alpha                                                                             | NM_004843.2                                                             | HS00175472_m1  | Yes |
| NFIL3                        | nuclear factor, interleukin 3 regulated                                                                    | NM_005384.2                                                             | HS00705412_s1  | Yes |
| <b>JAK-STAT-SOCS pathway</b> |                                                                                                            |                                                                         |                |     |
| JAK1                         | Janus kinase 1 (a protein tyrosine kinase)                                                                 | NM_002227.1                                                             | HS00233820_m1  | Yes |
| JAK2                         | Janus kinase 2 (a protein tyrosine kinase)                                                                 | NM_004972.2                                                             | HS00234567_m1  | Yes |
| JAK3                         | Janus kinase 3 (a protein tyrosine kinase, leukocyte)                                                      | NM_000215.2                                                             | HS00169663_m1  | Yes |
| STAT1                        | signal transducer and activator of transcription 1, 91kDa                                                  | NM_139266.1,NM_007315.2                                                 | HS00234829_m1  | Yes |
| STAT2                        | signal transducer and activator of transcription 2, 113kDa                                                 |                                                                         | HS00237139_m1  | Yes |
| STAT3                        | signal transducer and activator of transcription 3 (acute-phase response factor)                           |                                                                         | HS00234174_m1  | Yes |
| STAT4                        | signal transducer and activator of transcription 4                                                         |                                                                         | HS00231372_m1  | Yes |
| SOCs1                        | suppressor of cytokine signaling 1                                                                         |                                                                         | HS00705164_s1  | Yes |
| SOCs2                        | suppressor of cytokine signaling 2                                                                         |                                                                         | HS00919620_m1  | Yes |
| SOCs3                        | suppressor of cytokine signaling 3                                                                         |                                                                         | HS00269575_s1  | Yes |
| SOCs4                        | suppressor of cytokine signaling 4                                                                         |                                                                         | HS00365582_s1  | Yes |
| SOCs5                        | suppressor of cytokine signaling 5                                                                         |                                                                         | HS00367107_m1  | Yes |
| SOCs6                        | suppressor of cytokine signaling 6                                                                         |                                                                         | HS00377781_m1  | Yes |

|                                                                     |                                                                                                                                         |                                                 |               |     |
|---------------------------------------------------------------------|-----------------------------------------------------------------------------------------------------------------------------------------|-------------------------------------------------|---------------|-----|
| SOC57                                                               | suppressor of cytokine signaling 7                                                                                                      | NM_014598.1                                     | Hs00389987_m1 | Yes |
| <b>IFN pathway</b>                                                  |                                                                                                                                         |                                                 |               |     |
| IFNA2                                                               | interferon, alpha 2                                                                                                                     | NM_000605.2                                     | Hs00265051_s1 | No  |
| IFNA8                                                               | interferon, alpha 8                                                                                                                     | NM_002170.2                                     | Hs00268883_s1 | No  |
| IFNA21                                                              | interferon, alpha 21                                                                                                                    | NM_002175.1                                     | Hs00356648_s1 | No  |
| IFNAR1                                                              | interferon (alpha, beta and omega) receptor 1                                                                                           | NM_000629.2                                     | Hs00265057_m1 | Yes |
| IFNAR2                                                              | interferon (alpha, beta and omega) receptor 2                                                                                           | NM_207584.1,NM_207585.1,NM_000874.3             | Hs00174198_m1 | Yes |
| IFNB1                                                               | interferon, beta 1, fibroblast                                                                                                          | NM_002176.2                                     | Hs00277188_s1 | No  |
| IFNG                                                                | interferon, gamma                                                                                                                       | NM_000619.2                                     | Hs00174143_m1 | Yes |
| IFNGR1                                                              | interferon gamma receptor 1                                                                                                             | NM_000416.1                                     | Hs00166223_m1 | Yes |
| IRF1                                                                | interferon regulatory factor 1                                                                                                          | NM_002198.1                                     | Hs00233698_m1 | Yes |
| IRF2                                                                | interferon regulatory factor 2                                                                                                          | NM_002199.2                                     | Hs00180006_m1 | Yes |
| IRF3                                                                | interferon regulatory factor 3                                                                                                          | NM_001571.2                                     | Hs00155574_m1 | Yes |
| IRF4                                                                | interferon regulatory factor 4                                                                                                          | NM_002460.1                                     | Hs00180031_m1 | Yes |
| IRF5                                                                | interferon regulatory factor 5                                                                                                          | NM_032643.3,NM_002200.3                         | Hs00158114_m1 | Yes |
| IRF6                                                                | interferon regulatory factor 6                                                                                                          | NM_006147.2                                     | Hs00196213_m1 | Yes |
| IRF7                                                                | interferon regulatory factor 7                                                                                                          | NM_001572.2,NM_004029.1,NM_004031.1             | Hs00185375_m1 | Yes |
| IFI16                                                               | interferon, gamma-inducible protein 16                                                                                                  | NM_005531.1                                     | Hs00194261_m1 | Yes |
| G1P3                                                                | interferon, alpha-inducible protein (clone IFI-6-16)                                                                                    | NM_022872.1,NM_022873.1,NM_002038.2             | Hs00242571_m1 | Yes |
| <b>TNF<math>\alpha</math> and TGF<math>\beta</math> pathways</b>    |                                                                                                                                         |                                                 |               |     |
| TNF                                                                 | tumor necrosis factor (TNF superfamily, member 2)                                                                                       | NM_000594.2                                     | Hs00174128_m1 | Yes |
| LTA                                                                 | lymphotoxin alpha (TNF superfamily, member 1)                                                                                           | NM_000595.2                                     | Hs00236874_m1 | Yes |
| LTB                                                                 | lymphotoxin beta (TNF superfamily, member 3)                                                                                            | NM_009588.1,NM_002341.1                         | Hs00242739_m1 | Yes |
| TNFRSF14                                                            | tumor necrosis factor receptor superfamily, member 14 (herpesvirus entry mediator)                                                      | NM_003820.2                                     | Hs00187058_m1 | Yes |
| TNFRSF18                                                            | tumor necrosis factor receptor superfamily, member 18                                                                                   | NM_148901.1,NM_148902.1,NM_004195.2             | Hs00188346_m1 | No  |
| TNFRSF1A                                                            | tumor necrosis factor receptor superfamily, member 1A                                                                                   | NM_001065.2                                     | Hs00533560_m1 | Yes |
| TNFRSF1B                                                            | tumor necrosis factor receptor superfamily, member 1B                                                                                   | NM_001066.2                                     | Hs00153550_m1 | Yes |
| TRAF1                                                               | TNF receptor-associated factor 1                                                                                                        | NM_005658.3                                     | Hs00194639_m1 | Yes |
| TRAF2                                                               | TNF receptor-associated factor 2                                                                                                        |                                                 | Hs00377454_m1 | No  |
| TRAF3                                                               | TNF receptor-associated factor 3                                                                                                        | NM_145726.1,NM_145725.1,NM_003300.2             | Hs00377462_m1 | Yes |
| TRAF3IP1                                                            | TNF receptor-associated factor 3 interacting protein 1                                                                                  | NM_015650.2                                     | Hs00249015_m1 | Yes |
| TRAF4                                                               | TNF receptor-associated factor 4                                                                                                        | NM_145751.1,NM_004295.2                         | Hs00188755_m1 | Yes |
| TRAF5                                                               | TNF receptor-associated factor 5                                                                                                        | NM_145759.1,NM_004619.2                         | Hs00182979_m1 | Yes |
| TRAF6                                                               | TNF receptor-associated factor 6                                                                                                        | NM_004620.2                                     | Hs00371508_m1 | Yes |
| TRAF7                                                               | TNF receptor-associated factor 7                                                                                                        | NM_032271.2,NM_206835.1                         | Hs00260228_m1 | Yes |
| TRAP1                                                               | TNF receptor-associated protein 1                                                                                                       | NM_016292.1                                     | Hs00212476_m1 | Yes |
| TTRAP                                                               | TRAF and TNF receptor associated protein                                                                                                | NM_016614.2                                     | Hs00213282_m1 | Yes |
| TGFB1                                                               | transforming growth factor, beta 1                                                                                                      | NM_000660.3                                     | Hs00171257_m1 | Yes |
| TGFBR1                                                              | transforming growth factor, beta receptor I (activin A receptor type II-like kinase, 53kDa)                                             | NM_004612.2                                     | Hs00610319_m1 | Yes |
| TGFBR2                                                              | transforming growth factor, beta receptor II (70/80kDa)                                                                                 | NM_003242.4,NM_001024847.1                      | Hs00559661_m1 | Yes |
| <b>NF-<math>\kappa</math>B pathway</b>                              |                                                                                                                                         |                                                 |               |     |
| IKKB                                                                | inhibitor of kappa light polypeptide gene enhancer in B-cells, kinase beta                                                              | NM_001556.1                                     | Hs00826074_m1 | Yes |
| IKBK                                                                | inhibitor of kappa light polypeptide gene enhancer in B-cells, kinase beta                                                              | NM_003639.2                                     | Hs00416633_m1 | No  |
| NFKB1                                                               | nuclear factor of kappa light polypeptide gene enhancer in B-cells, kinase gamma                                                        | NM_003998.2                                     | Hs00765730_m1 | Yes |
| NFKB2                                                               | nuclear factor of kappa light polypeptide gene enhancer in B-cells 1 (p105)                                                             | NM_002502.2                                     | Hs00174517_m1 | Yes |
| NFKBIA                                                              | nuclear factor of kappa light polypeptide gene enhancer in B-cells inhibitor, alpha                                                     | NM_020529.1                                     | Hs00153283_m1 | Yes |
| NFKBIB                                                              | nuclear factor of kappa light polypeptide gene enhancer in B-cells inhibitor, beta                                                      | NM_001001716.1,NM_002503.3                      | Hs00182115_m1 | Yes |
| RELA                                                                | v-rel reticuloendotheliosis viral oncogene homolog (avian)                                                                              | NM_002908.2                                     | Hs00231279_m1 | Yes |
| RELB                                                                | v-rel reticuloendotheliosis viral oncogene homolog A, nuclear factor of kappa light polypeptide gene enhancer in B-cells 3, p65 (avian) | NM_021975.2                                     | Hs00153294_m1 | Yes |
|                                                                     | v-rel reticuloendotheliosis viral oncogene homolog B, nuclear factor of kappa light polypeptide gene enhancer in B-cells 3 (avian)      | NM_006509.2                                     | Hs00232399_m1 | Yes |
| <b>c-Jun N-terminal kinases</b>                                     |                                                                                                                                         |                                                 |               |     |
| MAPK8                                                               | mitogen-activated protein kinase 8; c-Jun N-terminal kinase 1                                                                           | NM_139046.1,NM_139047.1,NM_139049.1,NM_002750.2 | Hs00177083_m1 | Yes |
| MAPK9                                                               | mitogen-activated protein kinase 9; c-Jun N-terminal kinase 2                                                                           | NM_139068.1,NM_139069.1,NM_139070.1,NM_002752.3 | Hs00177102_m1 | Yes |
| <b>Toll-like receptors and lipopolysaccharide signaling pathway</b> |                                                                                                                                         |                                                 |               |     |
| TLR2                                                                | toll-like receptor 2                                                                                                                    | NM_003264.3                                     | Hs00610101_m1 | Yes |
| TLR4                                                                | toll-like receptor 4                                                                                                                    | NM_138554.1,NM_003266.2                         | Hs00152939_m1 | Yes |
| TLR6                                                                | toll-like receptor 6                                                                                                                    | NM_006068.2                                     | Hs00271977_s1 | Yes |
| CD14                                                                | CD14 antigen (lipopolysaccharide receptor)                                                                                              | NM_000591.1                                     | Hs00169122_g1 | Yes |
| LBP                                                                 | lipopolysaccharide binding protein                                                                                                      | NM_004139.2                                     | Hs00188074_m1 | Yes |
| LITAF                                                               | lipopolysaccharide-induced TNF factor                                                                                                   | NM_004862.2                                     | Hs00191583_m1 | Yes |
| CHUK                                                                | conserved helix-loop-helix ubiquitous kinase; I $\kappa$ B kinase, alpha                                                                | NM_001278.3                                     | Hs00175141_m1 | Yes |
| <b>Matrix proteases and inhibitors of matrix proteases</b>          |                                                                                                                                         |                                                 |               |     |
| ADAM10                                                              | ADAM metalloproteinase domain 10                                                                                                        | NM_001110.1                                     | Hs00153853_m1 | Yes |
| MMP1                                                                | matrix metalloproteinase 1 (interstitial collagenase)                                                                                   | NM_002421.2                                     | Hs00233958_m1 | No  |
| MMP2                                                                | matrix metalloproteinase 2 (gelatinase A, 72kDa gelatinase, 72kDa type IV collagenase)                                                  | NM_004530.1                                     | Hs00234422_m1 | Yes |
| MMP3                                                                | matrix metalloproteinase 3 (stromelysin 1, progelatinase)                                                                               | NM_002422.2                                     | Hs00233962_m1 | No  |
| MMP8                                                                | matrix metalloproteinase 8 (neutrophil collagenase)                                                                                     | NM_002424.1                                     | Hs00233972_m1 | Yes |
| MMP9                                                                | matrix metalloproteinase 9 (gelatinase B, 92kDa gelatinase, 92kDa type IV collagenase)                                                  | NM_004994.1                                     | Hs00234579_m1 | Yes |
| MMP10                                                               | matrix metalloproteinase 10 (stromelysin 2)                                                                                             | NM_002425.1                                     | Hs00233987_m1 | No  |
| MMP11                                                               | matrix metalloproteinase 11 (stromelysin 3)                                                                                             | NM_005940.3                                     | Hs00171829_m1 | Yes |
| MMP13                                                               | matrix metalloproteinase 13 (collagenase 3)                                                                                             | NM_002427.2                                     | Hs00233992_m1 | No  |
| MMP14                                                               | matrix metalloproteinase 14 (membrane-inserted)                                                                                         | NM_004995.2                                     | Hs00237119_m1 | Yes |
| MMP15                                                               | matrix metalloproteinase 15 (membrane-inserted)                                                                                         | NM_002428.2                                     | Hs00233997_m1 | Yes |
| PLAT                                                                | plasminogen activator, tissue                                                                                                           | NM_033011.1,NM_000930.2,NM_000931.2             | Hs00263492_m1 | Yes |
| PLAU                                                                | plasminogen activator, urokinase                                                                                                        | NM_002658.2                                     | Hs00170182_m1 | Yes |

|                          |       |                                                                                               |                                          |               |     |
|--------------------------|-------|-----------------------------------------------------------------------------------------------|------------------------------------------|---------------|-----|
| SERPIN1                  | PAI-1 | serpin peptidase inhibitor, clade E (nexin, plasminogen activator inhibitor type 1), member 1 | NM_000602.1                              | Hs00167155_m1 | Yes |
| TIMP1                    |       | TIMP metalloproteinase inhibitor 1                                                            | NM_003254.1                              | Hs00171558_m1 | Yes |
| TIMP2                    |       | TIMP metalloproteinase inhibitor 2                                                            | NM_003255.3                              | Hs00234278_m1 | Yes |
| TIMP3                    |       | TIMP metalloproteinase inhibitor 3 (Sorsby fundus dystrophy, pseudoinflammatory)              | NM_000362.3                              | Hs00165949_m1 | Yes |
| <b>Cell junction</b>     |       |                                                                                               |                                          |               |     |
| GJA1                     |       | gap junction protein, alpha 1, 43kDa (connexin 43)                                            | NM_000165.2                              | Hs00748445_s1 | Yes |
| GJA3                     |       | gap junction protein, alpha 3, 46kDa (connexin 46)                                            | NM_021954.2                              | Hs00254296_s1 | No  |
| GJA12                    |       | gap junction protein, alpha 12, 47kDa                                                         | NM_020435.2                              | Hs00252713_s1 | Yes |
| GJB1                     |       | gap junction protein, beta 1, 32kDa (connexin 32, Charcot-Marie-Tooth neuropathy, X-linked)   | NM_000166.2                              | Hs00702141_s1 | Yes |
| GJB2                     |       | gap junction protein, beta 2, 26kDa (connexin 26)                                             | NM_004004.3                              | Hs00269615_s1 | Yes |
| CLDN5                    |       | claudin 5 (transmembrane protein deleted in velocardiofacial syndrome)                        | NM_003277.2                              | Hs00533949_s1 | Yes |
| CLDN10                   |       | claudin 10                                                                                    | NM_006984.3                              | Hs00199599_m1 | Yes |
| CLDN11                   |       | claudin 11 (oligodendrocyte transmembrane protein)                                            | NM_005602.4                              | Hs00194440_m1 | Yes |
| CRP                      |       | C-reactive protein, pentraxin-related                                                         | NM_000567.2,X56692.1,X56214.1,BC020766.1 | Hs00357041_m1 | Yes |
| <b>Housekeeping gene</b> |       |                                                                                               |                                          |               |     |
| RPLP0                    |       | ribosomal protein, large, P0                                                                  | NM_053275.3,NM_001002.3                  | Hs99999902_m1 | Yes |
