# Supplementary material for: Hepatic Expression Patterns of Inflammatory and Immune Response Genes Associated with Obesity and NASH in Morbidly Obese Patients
Source: PubMed Central journal article supplement (PMC2962651; doi:10.1371/journal.pone.0013577), 2010-10-22
Supplement: pone.0013577.s002.pdf [file pone.0013577.s002.pdf]

**Table S2. Differentially expressed genes in visceral adipose tissue of NASH patients versus S0 and S3 patients**

| Gene symbol                | S0        | S3         | NASH                    |
|----------------------------|-----------|------------|-------------------------|
| <b>CD</b>                  |           |            |                         |
| CD18                       | 1.00±0.15 | 1.78±0.26* | 1.80±0.18*              |
| CD80                       | 1.00±0.20 | 1.25±0.23  | 2.49±0.50* <sup>§</sup> |
| <b>Chemokines</b>          |           |            |                         |
| CXCL11                     | 1.00±0.10 | 2.77±0.63* | 3.51±0.78*              |
| CXCL16                     | 1.00±0.06 | 1.63±0.19* | 1.71±0.20*              |
| CXCL9                      | 1.00±0.04 | 1.77±0.44  | 3.40±0.94* <sup>§</sup> |
| <b>Interleukin pathway</b> |           |            |                         |
| IL27RA                     | 1.00±0.10 | 1.79±0.43* | 1.38±0.10*              |
| IL3RA                      | 1.00±0.11 | 1.76±0.26* | 1.60±0.20*              |
| IL15                       | 1.00±0.07 | 1.59±0.10* | 1.49±0.14*              |
| IL12RB1                    | 1.00±0.12 | 1.77±0.26* | 1.60±0.23*              |
| IL18BP                     | 1.00±0.05 | 1.46±0.22* | 1.65±0.12*              |

S0: patients with normal liver histology (n=6), S3: patients with severe steatosis (n=6), NASH: patients with severe steatosis and NASH (n=6). Results are expressed relative to S0 patients (mean±SEM) and were compared by using the non parametric Kruskal-Wallis test. \*P<0.05 compared with S0 patients and <sup>§</sup>P<0.05 compared with S3 patients.
